# Supplementary material for: Characterisation of Macrophage Polarisation in Mice Infected with Ninoa Strain of Trypanosoma cruzi
Source: MDPI journal article supplement (doi:10.3390/pathogens10111444), 2021-11-06
Supplement: s1 [file s1]

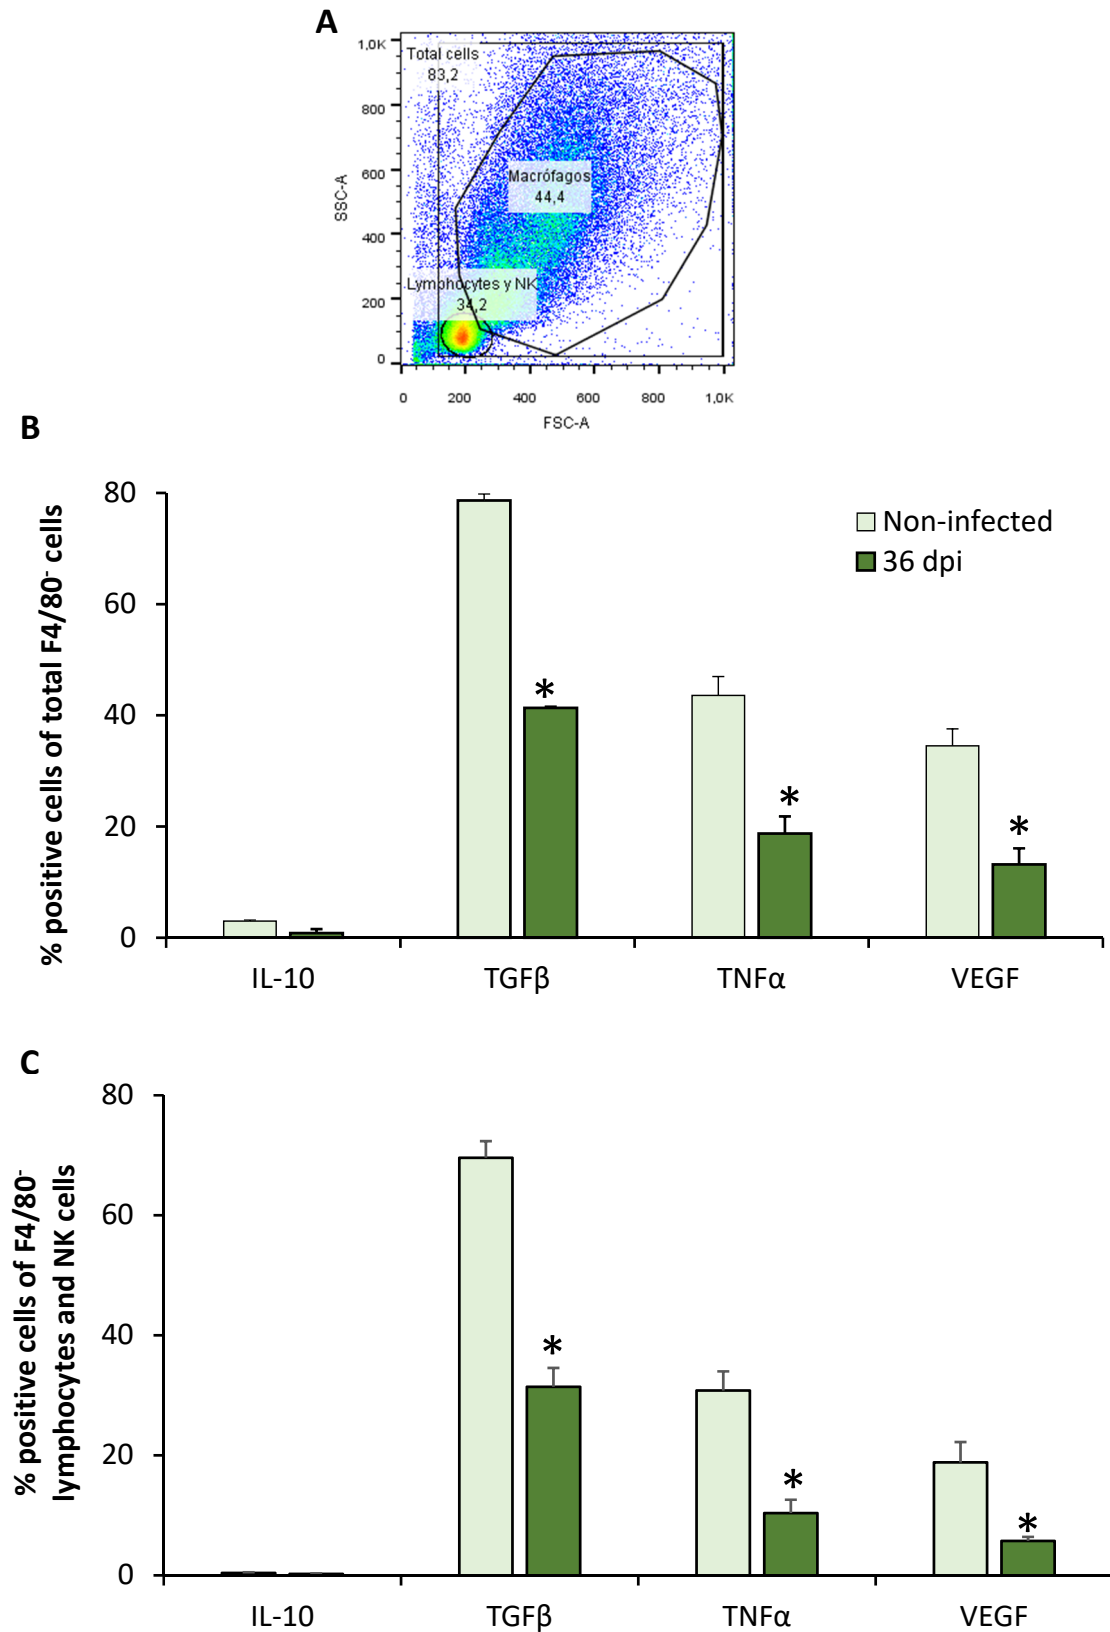

Supplementary Figure S1. Intracellular cytokines from F4/80 negative-PECs-post-infection with *T. cruzi* Ninoa strain. The C57BL/6 mice infected with  $7.5 \times 10^3$  parasites were sacrificed at 36 dpi, and PECs were stained with specific monoclonal antibodies against F4/80 and intracellular cytokines IL-10, TGFβ, TNFα, and VEGF. The cells were analysed by flow cytometry (A) in the region of macrophages (B), and lymphocytes and NK cells (C). Non-infected mice were used as controls. Mean  $\pm$  SD, n = 5. \*p < 0.05, ANOVA post hoc Bonferroni vs. non-infected.
